# Supplementary material for: Investigating the Broad Matrix-Gate Network in the Mitochondrial ADP/ATP Carrier through Molecular Dynamics Simulations
Source: MDPI journal article supplement (doi:10.3390/molecules27031071), 2022-02-05
Supplement: s1 [file s1]

# Supplementary Materials for

## **Investigating the broad matrix-gate network in the mitochondrial ADP/ATP carrier through molecular dynamics simulations**

Shihao Yao<sup>1,2</sup>, Boyuan Ma<sup>1,2</sup>, Qiuzi Yi<sup>1,2</sup>, Min-Xin Guan<sup>1,2,\*</sup>, Xiaohui Cang<sup>1,2,\*</sup>

\*Corresponding authors: xhcang@zju.edu.cn (X.C.) or to: gminxin88@zju.edu.cn (M.-X. G.)

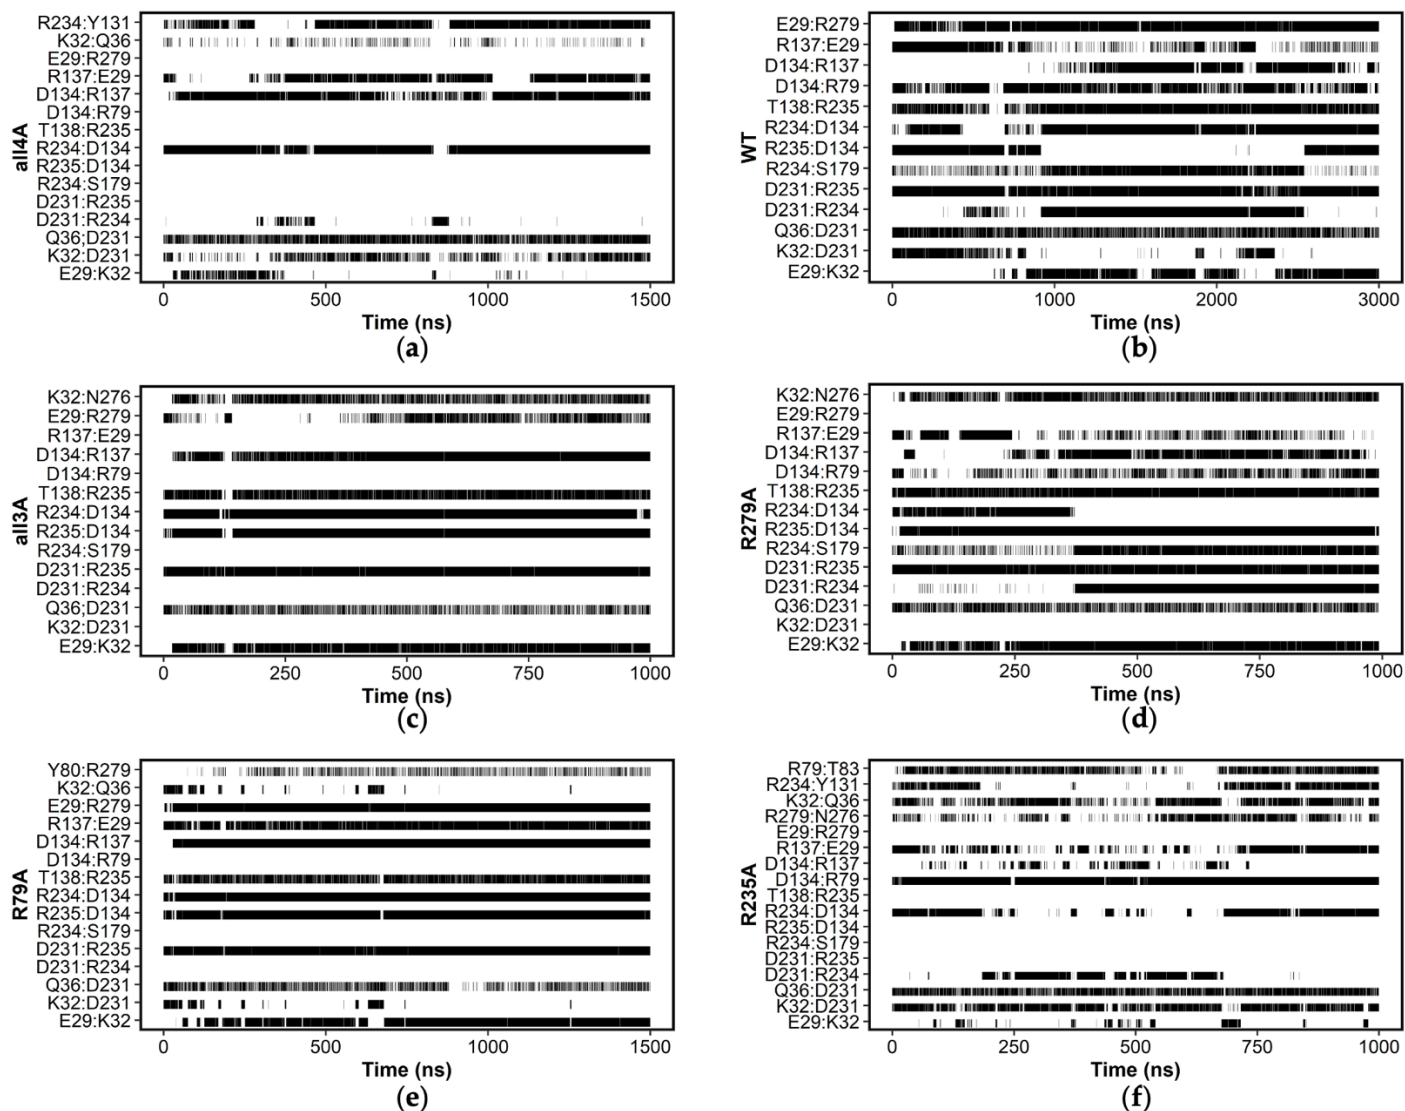

**Supplementary Figure S1.** The time evolution of the electrostatic interactions within the broad m-gate network in MD simulations on wild-type (a) and mutant (b-f) AAC.

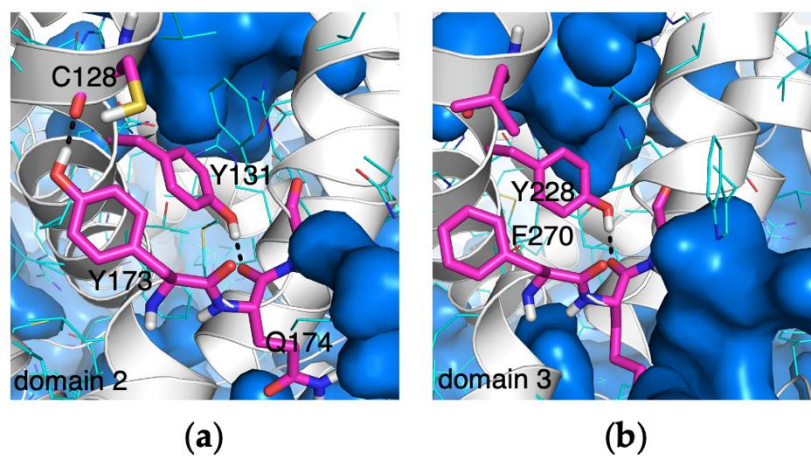

**Supplementary Figure S2.** The solvent within the pocket and bulk solvent at the matrix side is more separated due to presence of a tyrosine before the kink proline in domain 2 **(a)** and domain 3 **(b)**.

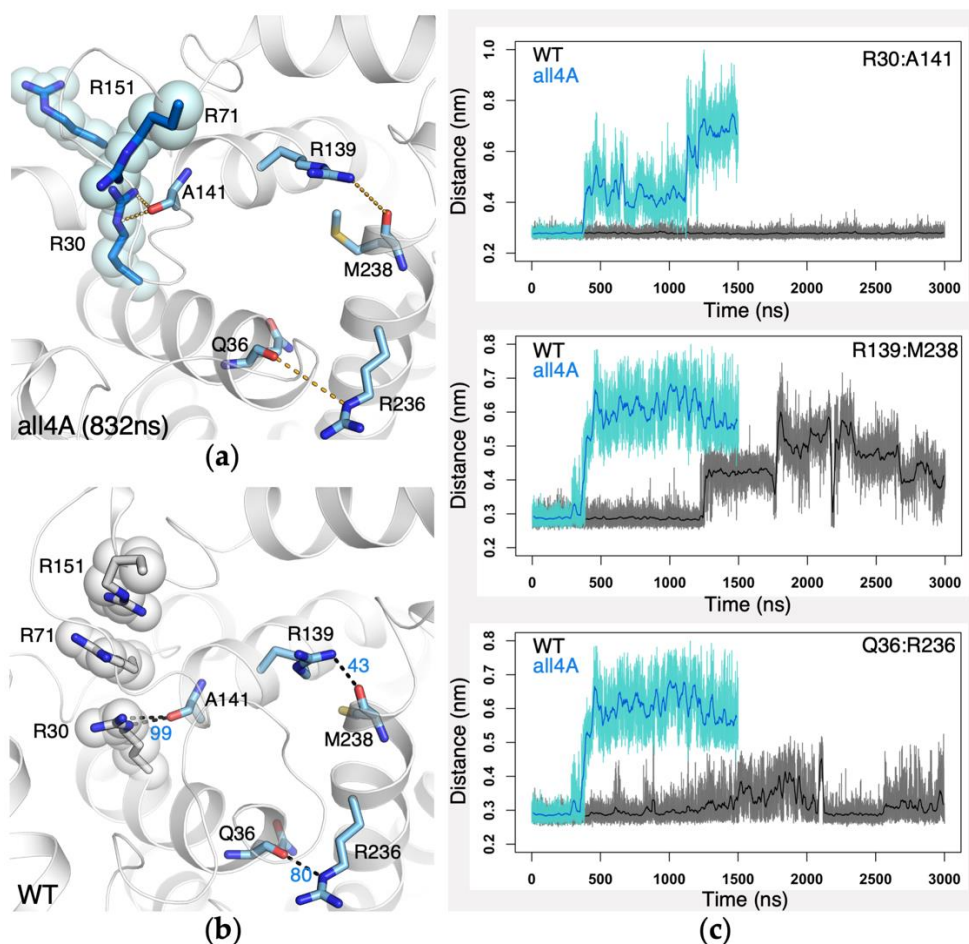

**Supplementary Figure S3.** The R30:R71:R151 stacking structure and time evolution of electrostatic interactions between the capping arginines and N-termini of odd-numbered helices. **(a)** A snapshot of *all4A*-AAC in which the the R30:R71:R151 stacking structure became dissociated and the cyclic electrostatic network between capping arginines (R30, R139 and R236) and N-termini of odd-numbered helices is disrupted. Yellow dash lines are added manually to indicate the H-bonds that do not appear in the shown snapshot. **(b)** A snapshot of *wild-type* AAC in which the the R30:R71:R151 stacking structure and the cyclic electrostatic network between capping arginines and N-termini of odd-numbered helices are maintained. The cyclic electrostatic interactions are shown in black dash lines, with occupancies shown in blue numbers. The occupancies were calculated over the 3- $\mu$ s trajectory. **(c)** Time evolutions of the distances between the three capping arginines and the corresponding N-termini of odd-numbered helices.
